# Supplementary material for: Soluble αβ-tubulins reversibly sequester TTC5 to regulate tubulin mRNA decay
Source: PubMed Central journal article supplement (PMC11570694; doi:10.1038/s41467-024-54036-0), 2024-11-17
Supplement: 41467_2024_54036_MOESM3_ESM.pdf [file 41467_2024_54036_MOESM3_ESM.pdf]

## Description of Additional Supplementary Files

**Supplementary Data 1:** Analysis of TurboID-TTC5 TMT-MS data as plotted in Fig. 1g. A two-sided Student's t-test was used to calculate log<sub>2</sub> fold-change differences and p-values between colchicine-treated samples (WT+Col) and untreated samples (WT-contr). No correction for multiple comparisons was applied.

**Supplementary Data 2:** Analysis of GFP-TTC5 label-free proteomics data as plotted in Fig. S1l. A two-sided Student's t-test was used to calculate log<sub>2</sub> fold-change differences and p-values between colchicine-treated samples and control samples. No correction for multiple comparisons was applied.

**Supplementary Data 3:** Tables showing the differences in deuterium uptake between two states. For each state comparison, results are shown for both differences in deuterium uptake by percentage (%D) and by number of deuterons (#D). Largest differences are highlighted in different colors: blue indicates PROTECTION of the peptide and red indicates increased EXPOSURE (usually associated with allosteric modifications)
